# Supplementary material for: MetaGeneTack: ab initio detection of frameshifts in metagenomic sequences
Source: PubMed Central journal article supplement (PMC3530910; doi:10.1093/bioinformatics/bts636), 2012-11-04
Supplement: supp_bts636_Supplementary_MetaGeneTack.pdf [file supp_bts636_Supplementary_MetaGeneTack.pdf]

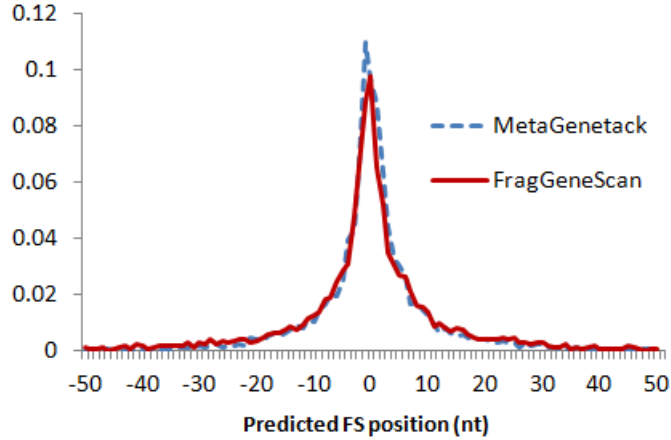

Figure S1: Distributions of the distance between predicted FS positions and true FS positions for 400nt, 600nt, and 800nt fragments with simulated frameshifts (Table 1). Deviations longer than 50nt are not shown. The standard deviations of the distributions are 10.3 and 12.6 for MetaGeneTack and FragGeneScan, respectively.

Table S1: Frameshift prediction accuracy for 400nt fragments from 18 prokaryotic genomes (with 20% of fragments containing frameshifts). Avg denotes the average of Sn and Sp. In general, MetaGeneTack reaches higher accuracy for bacteria than archaea (indicated by stars in Table S1). Interestingly, Sn of MetaGeneTack in frameshift detection is higher in high GC and low GC genomes than in middle GC genomes.

|                                   | Sequence ID | GC% | FragGeneScan |      |      | MetaGeneTack |      |      |
|-----------------------------------|-------------|-----|--------------|------|------|--------------|------|------|
|                                   |             |     | Sn           | Sp   | Avg  | Sn           | Sp   | Avg  |
| Methanosphaera stadtmanae *       | NC_007681   | 28  | 87.3         | 62.0 | 74.6 | 74.9         | 83.8 | 79.3 |
| Campylobacter jejuni              | NC_002163   | 31  | 88.6         | 50.6 | 69.6 | 84.3         | 67.3 | 75.8 |
| Staphylococcus aureus Mu50        | NC_002758   | 33  | 88.6         | 51.9 | 70.2 | 76.6         | 83.1 | 79.8 |
| Picrophilus torridus DSM 9790 *   | NC_005877   | 36  | 52.0         | 24.5 | 38.3 | 74.4         | 70.8 | 72.6 |
| Streptococcus pyogenes M1 GAS     | NC_002737   | 39  | 87.6         | 47.6 | 67.6 | 70.3         | 76.9 | 73.6 |
| Pasteurella multocida             | NC_002663   | 40  | 85.3         | 57.0 | 71.1 | 70.8         | 75.5 | 73.1 |
| Bacillus subtilis                 | NC_000964   | 44  | 78.3         | 39.6 | 58.9 | 64.3         | 71.9 | 68.1 |
| Thermotoga maritima               | NC_000853   | 46  | 60.8         | 28.7 | 44.7 | 66.8         | 61.5 | 64.1 |
| Archaeoglobus fulgidus *          | NC_000917   | 49  | 63.9         | 24.9 | 44.4 | 80.4         | 58.8 | 69.6 |
| Escherichia coli K12              | NC_000913   | 51  | 83.6         | 42.6 | 63.1 | 76.8         | 71.1 | 73.9 |
| Pyrobaculum aerophilum *          | NC_003364   | 51  | 65.0         | 27.8 | 46.4 | 60.1         | 55.1 | 57.6 |
| Salmonella typhimurium LT2        | NC_003197   | 52  | 85.6         | 43.9 | 64.8 | 75.4         | 70.7 | 73.0 |
| Thermococcus kodakaraensis KOD1 * | NC_006624   | 52  | 69.1         | 27.8 | 48.5 | 79.4         | 59.7 | 69.5 |
| Methanopyrus kandleri *           | NC_003551   | 61  | 81.3         | 36.1 | 58.7 | 68.3         | 60.4 | 64.3 |
| Caulobacter crescentus            | NC_002696   | 67  | 94.6         | 59.7 | 77.2 | 83.8         | 73.3 | 78.5 |
| Ralstonia solanacearum            | NC_003296   | 67  | 94.3         | 48.8 | 71.5 | 86.6         | 70.7 | 78.7 |
| Clavibacter michiganensis         | NC_010407   | 73  | 95.0         | 47.3 | 71.2 | 83.9         | 70.9 | 77.4 |
| Anaeromyxobacter dehalogenans     | NC_007760   | 75  | 96.4         | 57.5 | 76.9 | 87.1         | 82.4 | 84.8 |
| <b>Average</b>                    |             |     | 81.0         | 43.2 | 62.1 | 75.8         | 70.2 | 73.0 |
